# Supplementary material
Source: Springer Nature journal article supplement (https://www.springermedizin.de/resource/supplementary/12889_2013_6163_MOESM3_ESM.pdf/9496824)

**a**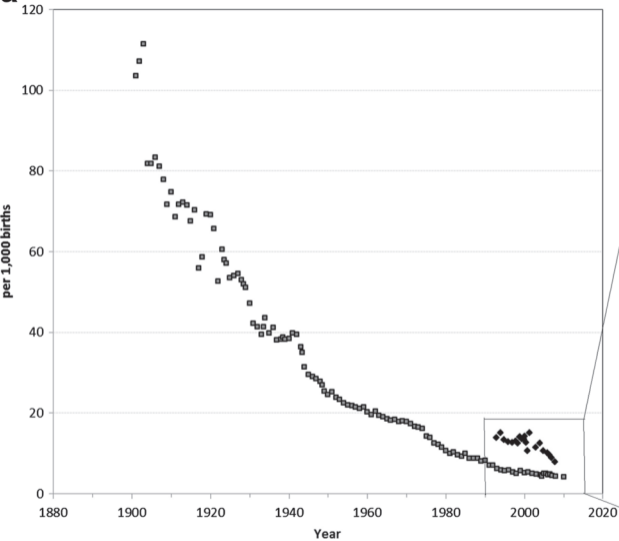

■ Australia ♦ Aboriginals

**b**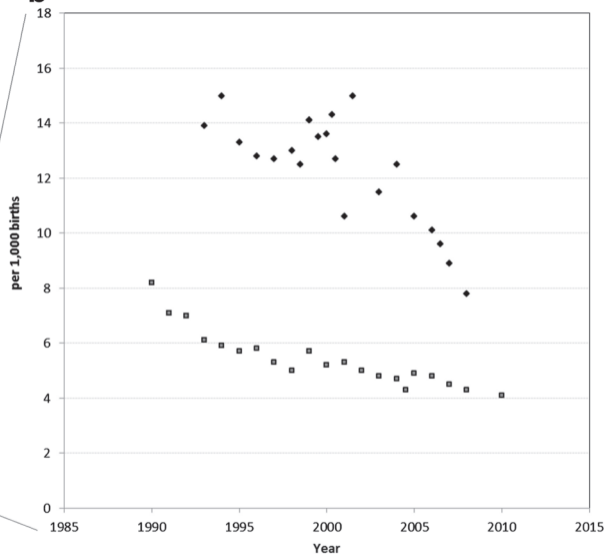

Sources: ABS (2012, 2001, 2009) [2, 24, 47]; Gray (2002) [54]; Hill (2007) [12].

Supplement: MOESM3 [file 9496824]
